# Supplementary material for: Insights into the structural diversity of cembranoids from Sarcophyton glaucum and their bioactivity
Source: Royal Society of Chemistry journal article supplement (doi:10.1039/d5ra00208g), 2025-01-01
Supplement: d5ra00208g1.pdf [file d5ra00208g1.pdf]

## Supporting Information

### Insights into the Structural Diversity of Cembranoids and Their Bioactivity from *Sarcophyton glaucum*

Kuei-Hung Lai,<sup>a,b,c</sup> Hsiao-Ling Chung,<sup>d,e</sup> You-Ying Chen,<sup>d,e</sup> Li-Guo Zheng,<sup>d,e</sup> Jui-Hsin Su,<sup>\*d,e</sup> and Mohamed El-Shazly<sup>f</sup>

#### Table of Contents

| <i>Names of figures and tables</i>                                                                                                                                                                                                              | <i>Pages</i> |
|-------------------------------------------------------------------------------------------------------------------------------------------------------------------------------------------------------------------------------------------------|--------------|
| Figure S1. <sup>1</sup> H NMR spectrum of <b>1</b> in CDCl <sub>3</sub> at 600 MHz                                                                                                                                                              | 3            |
| Figure S2. <sup>13</sup> C NMR spectrum of <b>1</b> in CDCl <sub>3</sub> at 150 MHz                                                                                                                                                             | 3            |
| Figure S3. DEPT spectrum of <b>1</b>                                                                                                                                                                                                            | 4            |
| Figure S4. HSQC spectrum of <b>1</b>                                                                                                                                                                                                            | 4            |
| Figure S5. HMBC spectrum of <b>1</b>                                                                                                                                                                                                            | 5            |
| Figure S6. COSY spectrum of <b>1</b>                                                                                                                                                                                                            | 5            |
| Figure S7. NOESY spectrum of <b>1</b>                                                                                                                                                                                                           | 6            |
| Figure S8. <sup>1</sup> H NMR spectrum of <b>4</b> in CDCl <sub>3</sub> at 600 MHz                                                                                                                                                              | 7            |
| Figure S9. <sup>13</sup> C NMR spectrum of <b>4</b> in CDCl <sub>3</sub> at 150 MHz                                                                                                                                                             | 7            |
| Figure S10. DEPT spectrum of <b>4</b>                                                                                                                                                                                                           | 8            |
| Figure S11. HSQC spectrum of <b>4</b>                                                                                                                                                                                                           | 8            |
| Figure S12. HMBC spectrum of <b>4</b>                                                                                                                                                                                                           | 9            |
| Figure S13. COSY spectrum of <b>4</b>                                                                                                                                                                                                           | 9            |
| Figure S14. NOESY spectrum of <b>4</b>                                                                                                                                                                                                          | 10           |
| Figure S15. <sup>1</sup> H NMR spectrum of <b>7</b> in CDCl <sub>3</sub> at 600 MHz                                                                                                                                                             | 11           |
| Figure S16. <sup>13</sup> C NMR spectrum of <b>7</b> in CDCl <sub>3</sub> at 150 MHz                                                                                                                                                            | 11           |
| Figure S17. DEPT spectrum of <b>7</b>                                                                                                                                                                                                           | 12           |
| Figure S18. HSQC spectrum of <b>7</b>                                                                                                                                                                                                           | 12           |
| Figure S19. HMBC spectrum of <b>7</b>                                                                                                                                                                                                           | 13           |
| Figure S20. COSY spectrum of <b>7</b>                                                                                                                                                                                                           | 13           |
| Figure S21. NOESY spectrum of <b>7</b>                                                                                                                                                                                                          | 14           |
| Table S1. Crystal data and structure refinement for <b>1</b> (ic22957).                                                                                                                                                                         | 15           |
| Table S2. Atomic coordinates ( $\times 10^4$ ) and equivalent isotropic displacement parameters ( $\text{\AA}^2 \times 10^3$ ) for <b>1</b> (ic22957). U(eq) is defined as one third of the trace of the orthogonalized U <sup>ij</sup> tensor. | 16           |
| Table S3. Bond lengths [ $\text{\AA}$ ] and angles [ $^\circ$ ] for <b>1</b> (ic22957).                                                                                                                                                         | 17           |

|                                                                                                                                                                                                                                                    |    |
|----------------------------------------------------------------------------------------------------------------------------------------------------------------------------------------------------------------------------------------------------|----|
| Table S4. Anisotropic displacement parameters ( $\text{\AA}^2 \times 10^3$ ) for <b>1</b> (ic22957). The anisotropic displacement factor exponent takes the form: $-2p^2 [h^2 a^{*2} U^{11} + \dots + 2 h k a^* b^* U^{12}]$                       | 19 |
| Table S5. Hydrogen coordinates ( $\times 10^4$ ) and isotropic displacement parameters ( $\text{\AA}^2 \times 10^3$ ) for <b>1</b> (ic22957).                                                                                                      | 20 |
| Table S6. Crystal data and structure refinement for <b>2</b> (ic22934).                                                                                                                                                                            | 21 |
| Table S7. Atomic coordinates ( $\times 10^4$ ) and equivalent isotropic displacement parameters ( $\text{\AA}^2 \times 10^3$ ) for <b>2</b> (ic22934). $U(\text{eq})$ is defined as one third of the trace of the orthogonalized $U^{ij}$ tensor.  | 22 |
| Table S8. Bond lengths [ $\text{\AA}$ ] and angles [ $^\circ$ ] for <b>2</b> (ic22934).                                                                                                                                                            | 23 |
| Table S9. Anisotropic displacement parameters ( $\text{\AA}^2 \times 10^3$ ) for <b>2</b> (ic22934). The anisotropic displacement factor exponent takes the form: $-2p^2 [h^2 a^{*2} U^{11} + \dots + 2 h k a^* b^* U^{12}]$                       | 25 |
| Table S10. Hydrogen coordinates ( $\times 10^4$ ) and isotropic displacement parameters ( $\text{\AA}^2 \times 10^3$ ) for <b>2</b> (ic22934).                                                                                                     | 26 |
| Table S11. Crystal data and structure refinement for <b>6</b> (ic22883).                                                                                                                                                                           | 27 |
| Table S12. Atomic coordinates ( $\times 10^4$ ) and equivalent isotropic displacement parameters ( $\text{\AA}^2 \times 10^3$ ) for <b>6</b> (ic22883). $U(\text{eq})$ is defined as one third of the trace of the orthogonalized $U^{ij}$ tensor. | 28 |
| Table S13. Bond lengths [ $\text{\AA}$ ] and angles [ $^\circ$ ] for <b>6</b> (ic22883).                                                                                                                                                           | 29 |
| Table S14. Anisotropic displacement parameters ( $\text{\AA}^2 \times 10^3$ ) for <b>6</b> (ic22883). The anisotropic displacement factor exponent takes the form: $-2p^2 [h^2 a^{*2} U^{11} + \dots + 2 h k a^* b^* U^{12}]$                      | 31 |
| Table S15. Hydrogen coordinates ( $\times 10^4$ ) and isotropic displacement parameters ( $\text{\AA}^2 \times 10^3$ ) for <b>6</b> (ic22883).                                                                                                     | 32 |

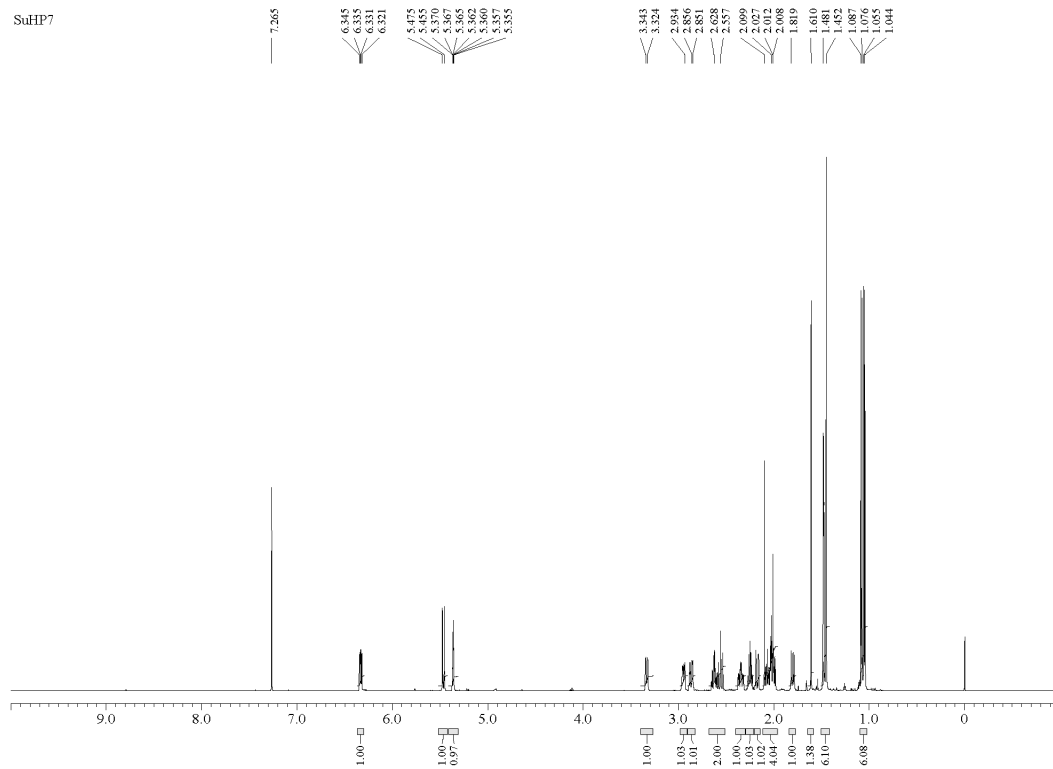

Figure S1.  $^1\text{H}$  NMR spectrum of **1** in  $\text{CDCl}_3$  at 600 MHz

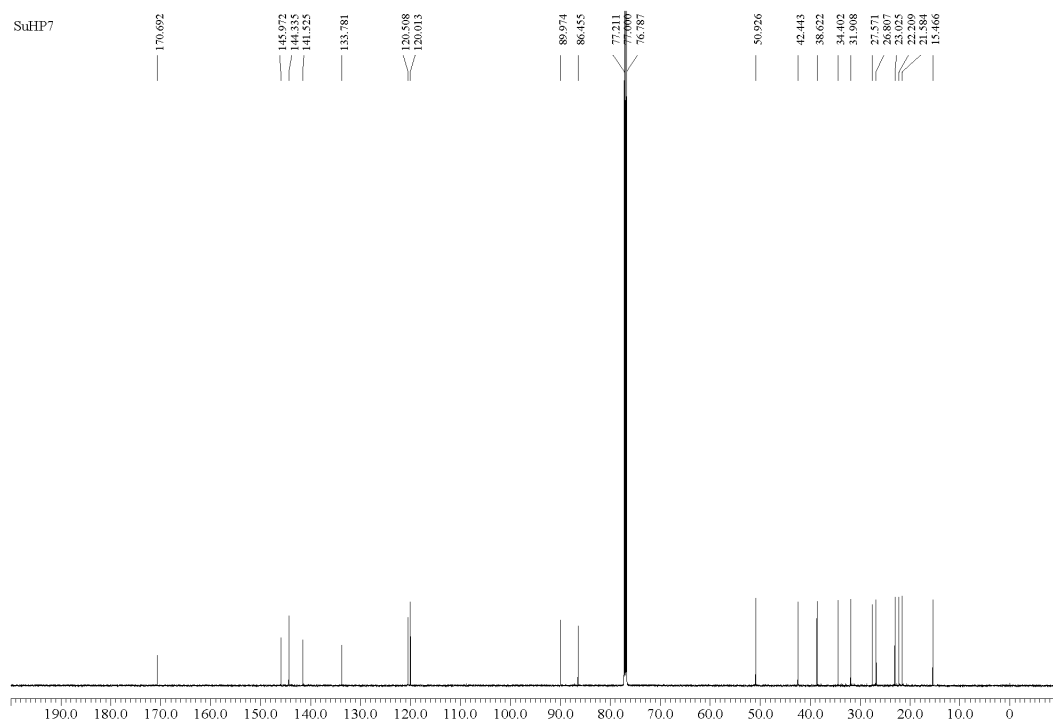

Figure S2.  $^{13}\text{C}$  NMR spectrum of **1** in  $\text{CDCl}_3$  at 150 MHz

Y = 135[deg]  
SuHP7

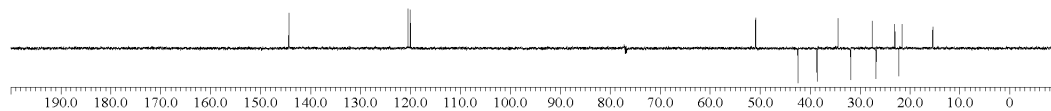

Y = 90[deg]  
SuHP7

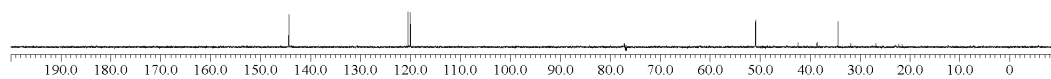

Figure S3. DEPT spectrum of 1

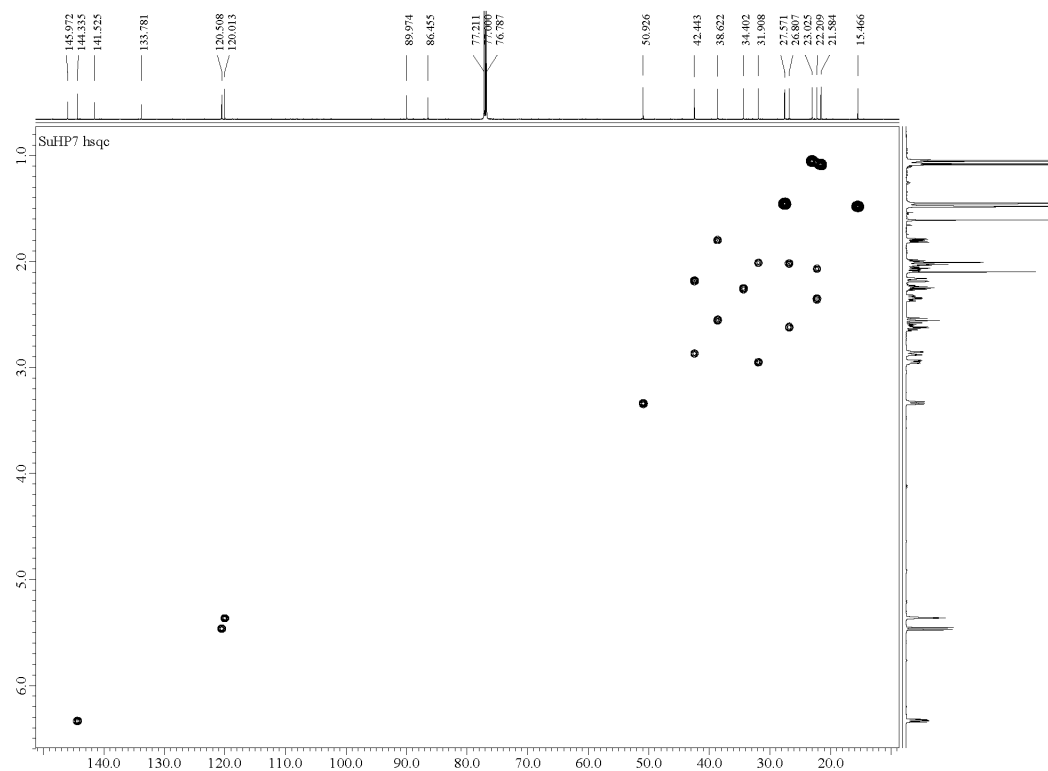

Figure S4. HSQC spectrum of 1

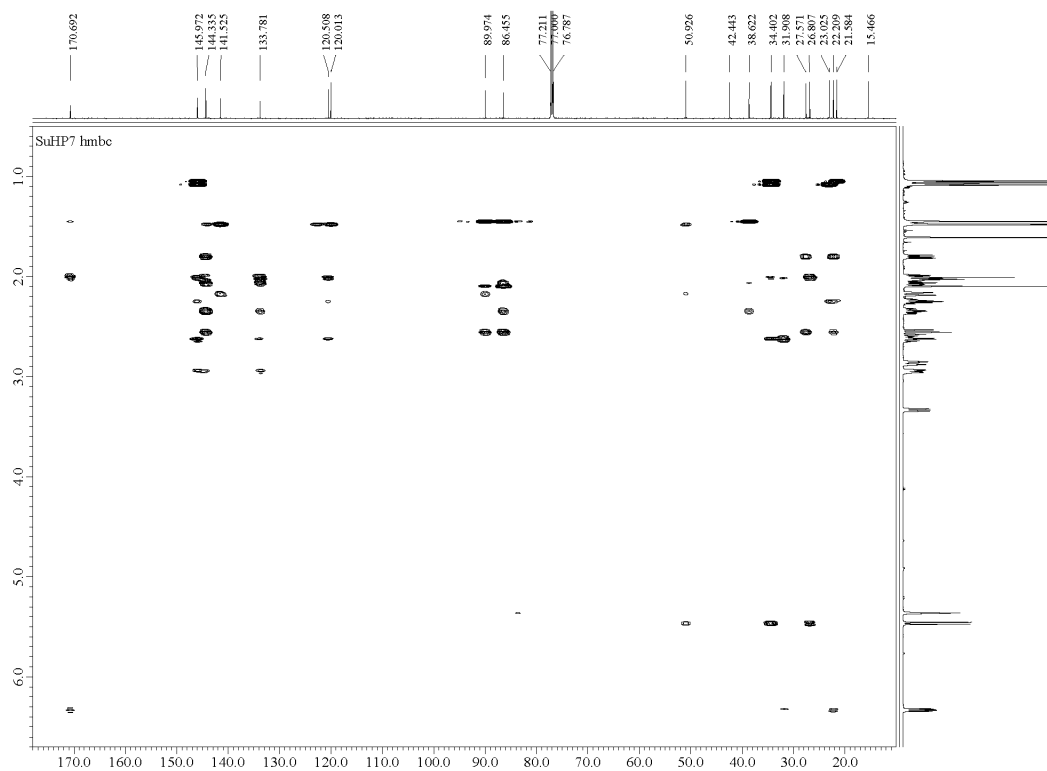

Figure S5. HMBC spectrum of **1**

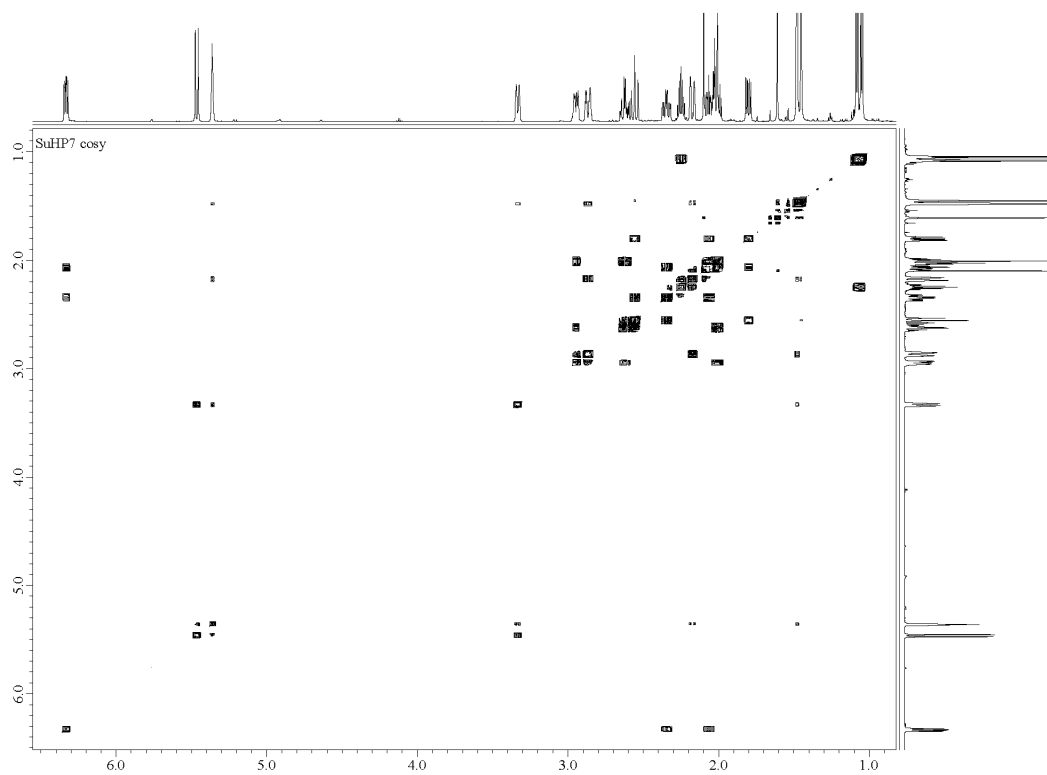

Figure S6. COSY spectrum of **1**

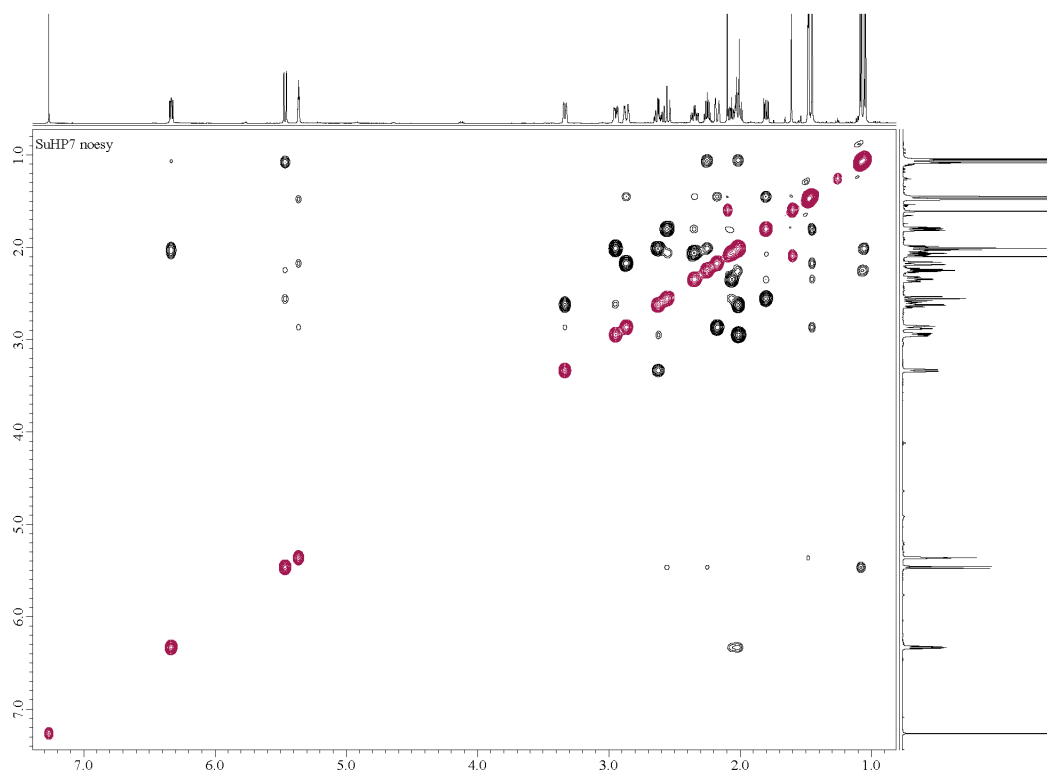

Figure S7. NOESY spectrum of **1**



Y = 135[deg]  
SuHP5

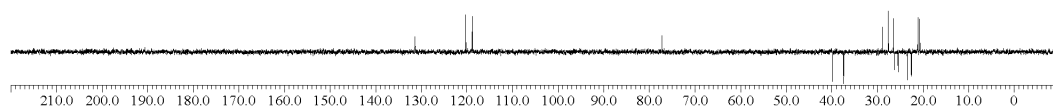

Y = 90[deg]  
SuHP5

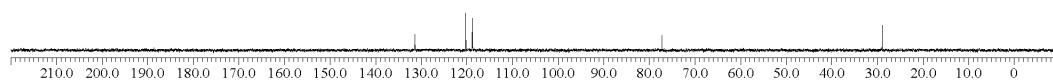

Figure S10. DEPT spectrum of 4

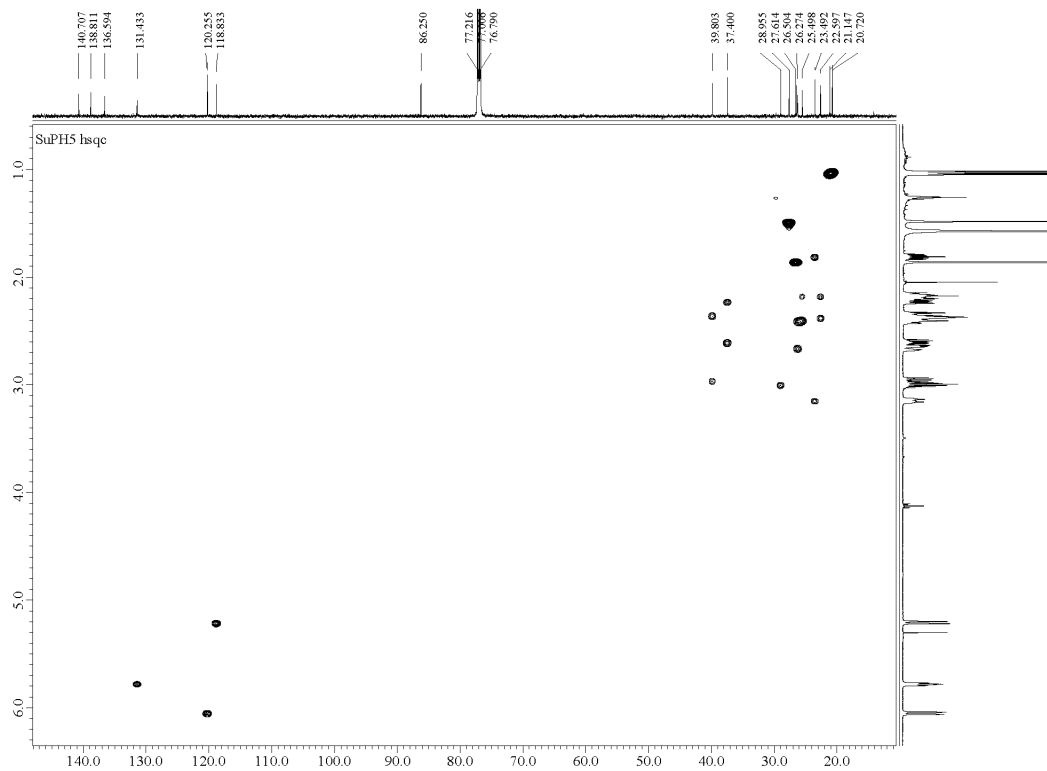

Figure S11. HSQC spectrum of 4



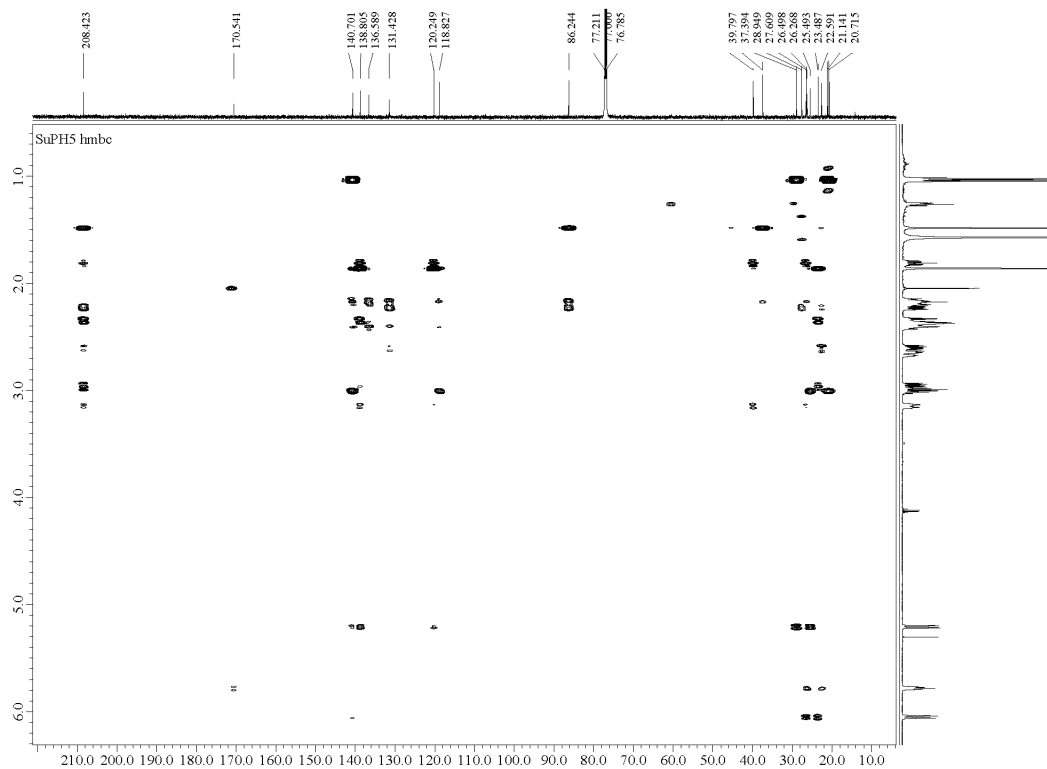

Figure S12. HMBC spectrum of 4

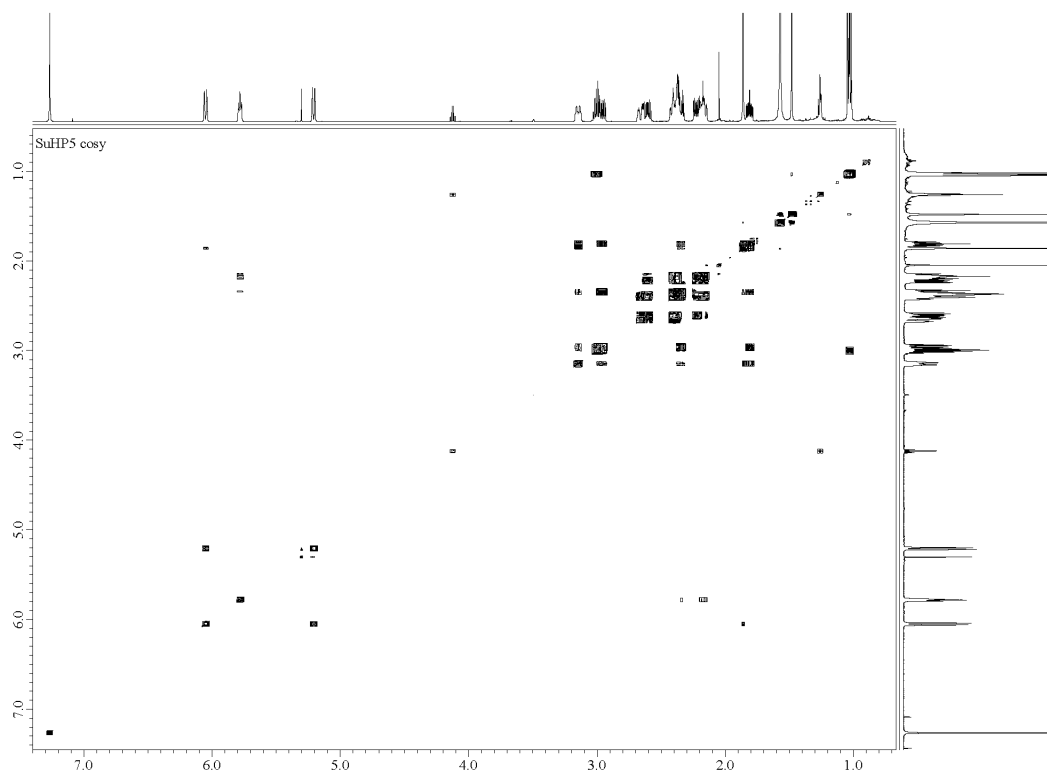

Figure S13. COSY spectrum of 4

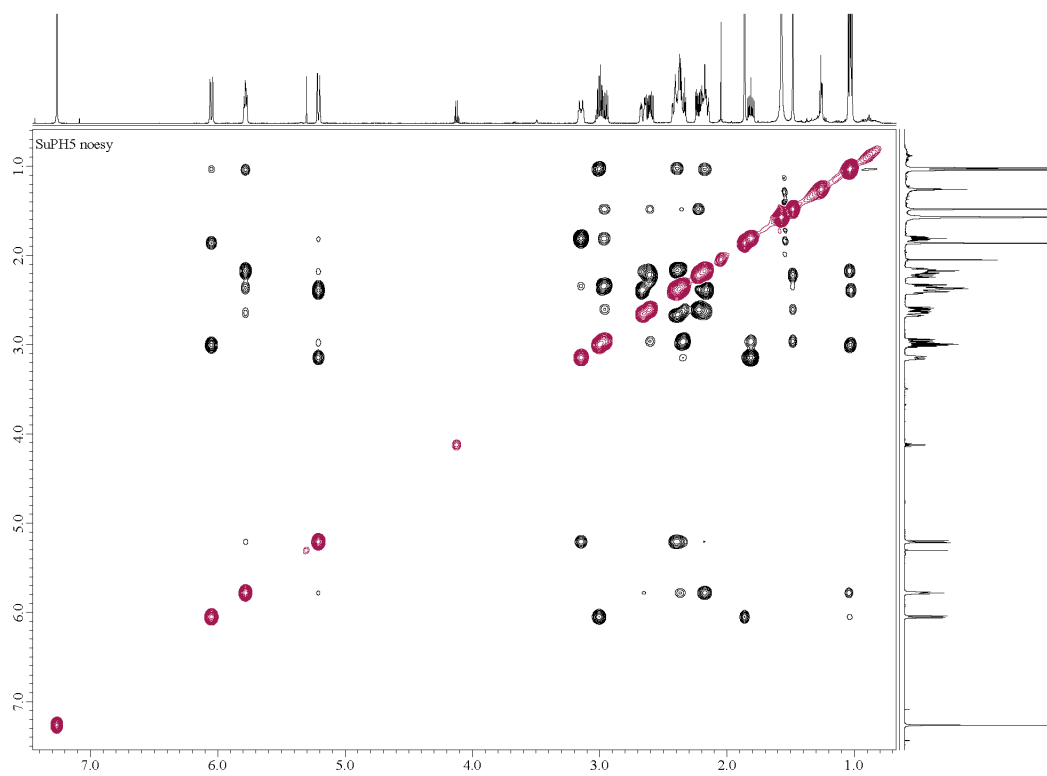

Figure S14. NOESY spectrum of **4**

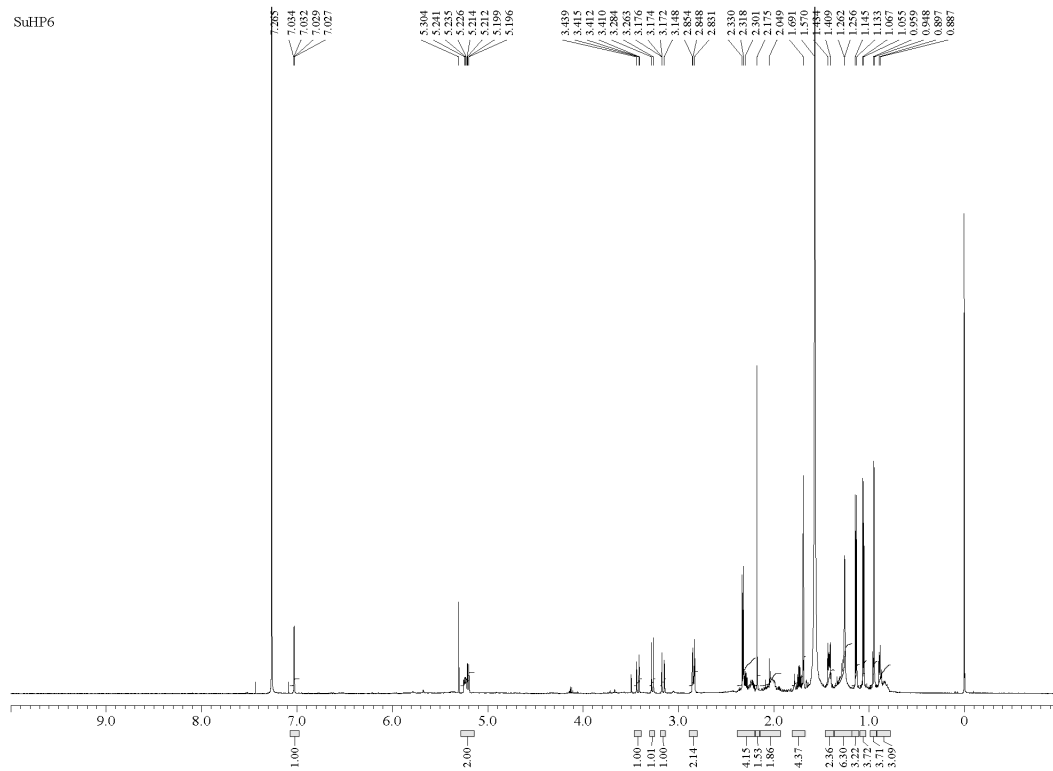

Figure S15.  $^1\text{H}$  NMR spectrum of **7** in  $\text{CDCl}_3$  at 600 MHz

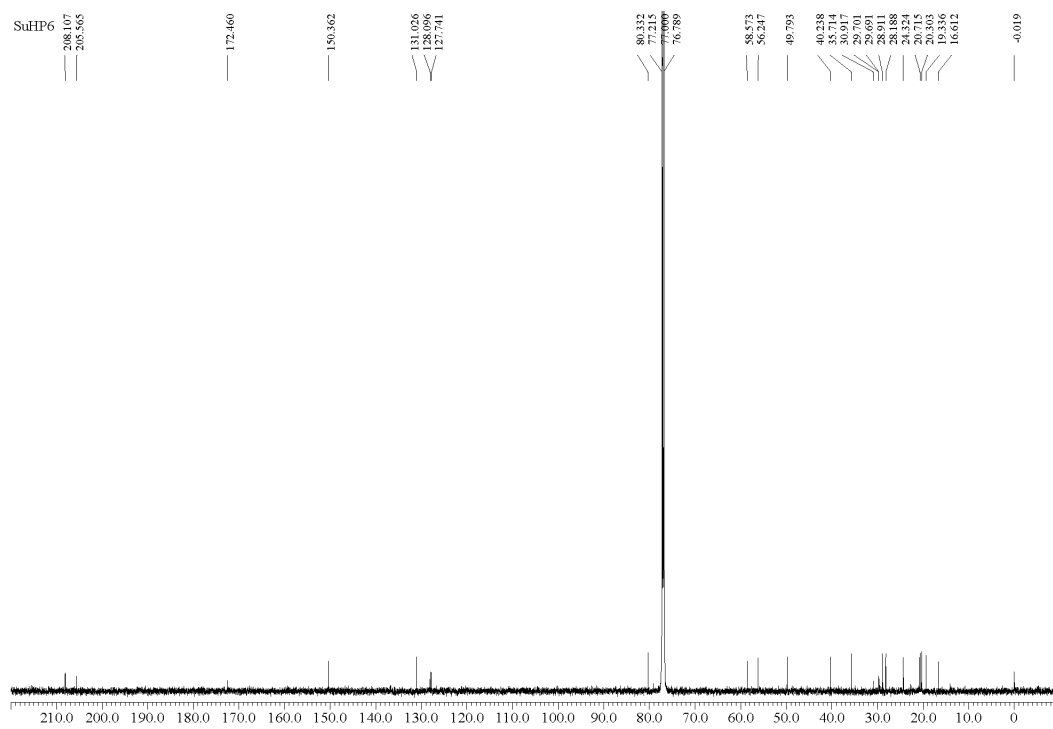

Figure S16.  $^{13}\text{C}$  NMR spectrum of **7** in  $\text{CDCl}_3$  at 150 MHz

Y = 135[deg]  
SuHP6

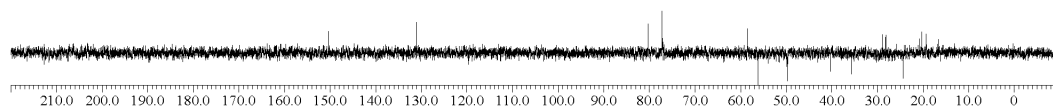

Y = 90[deg]  
SuHP6

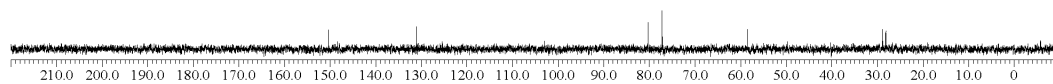

Figure S17. DEPT spectrum of 7

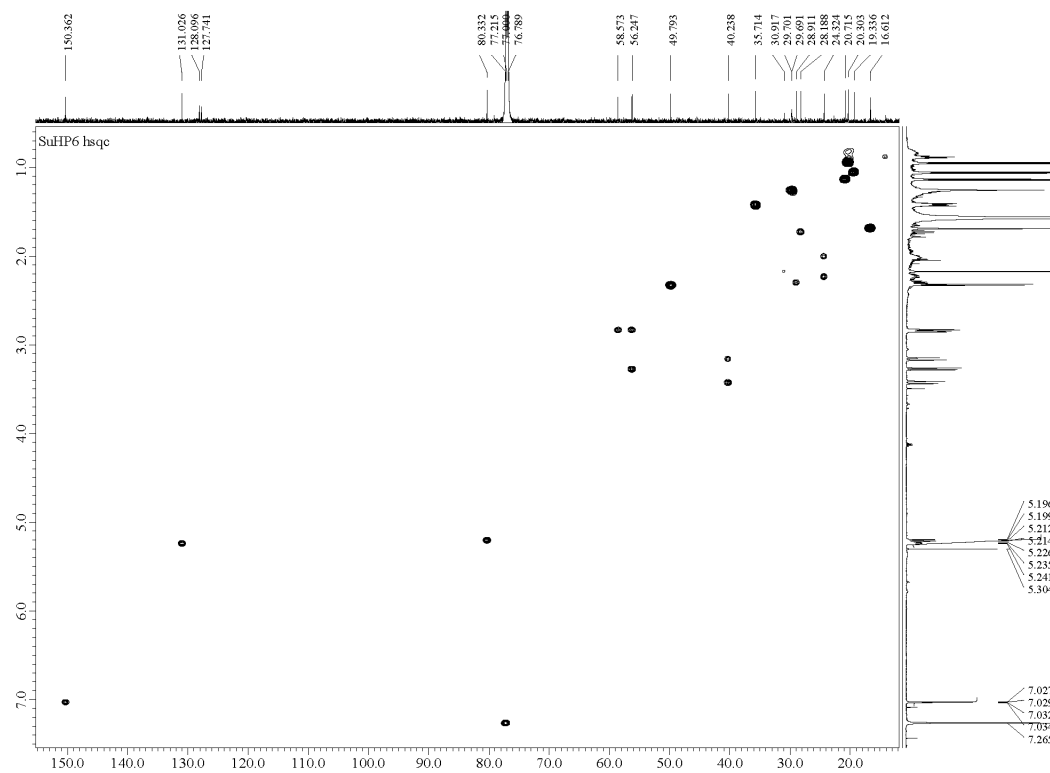

Figure S18. HSQC spectrum of 7

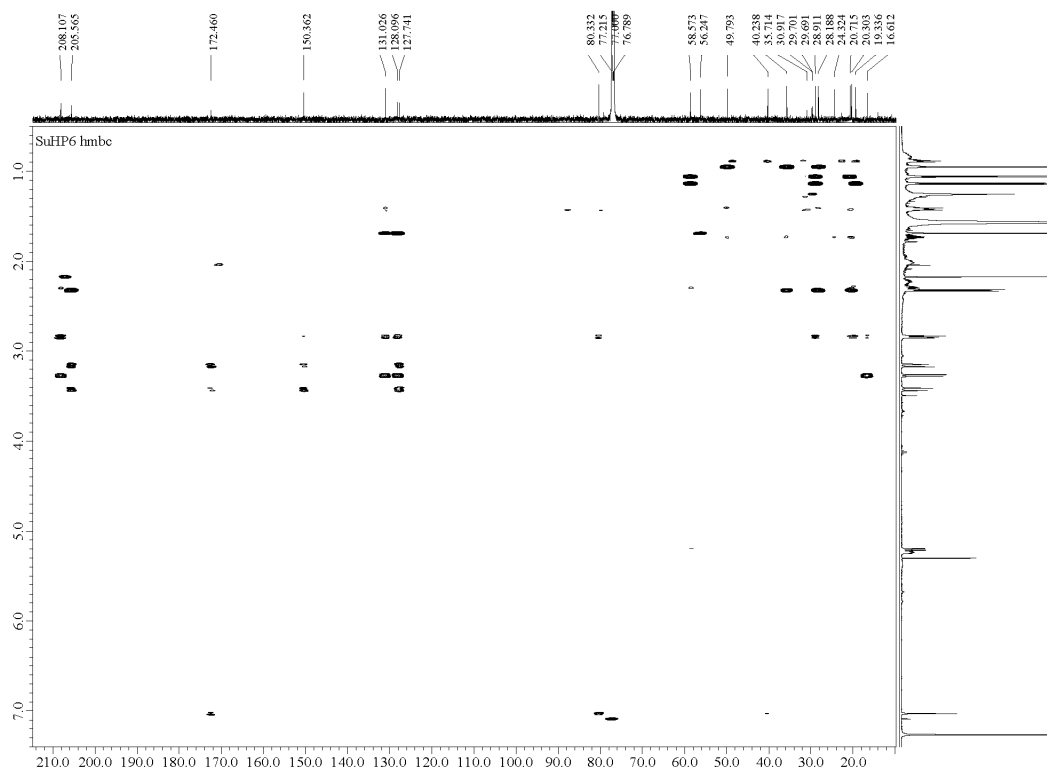

Figure S19. HMBC spectrum of 7

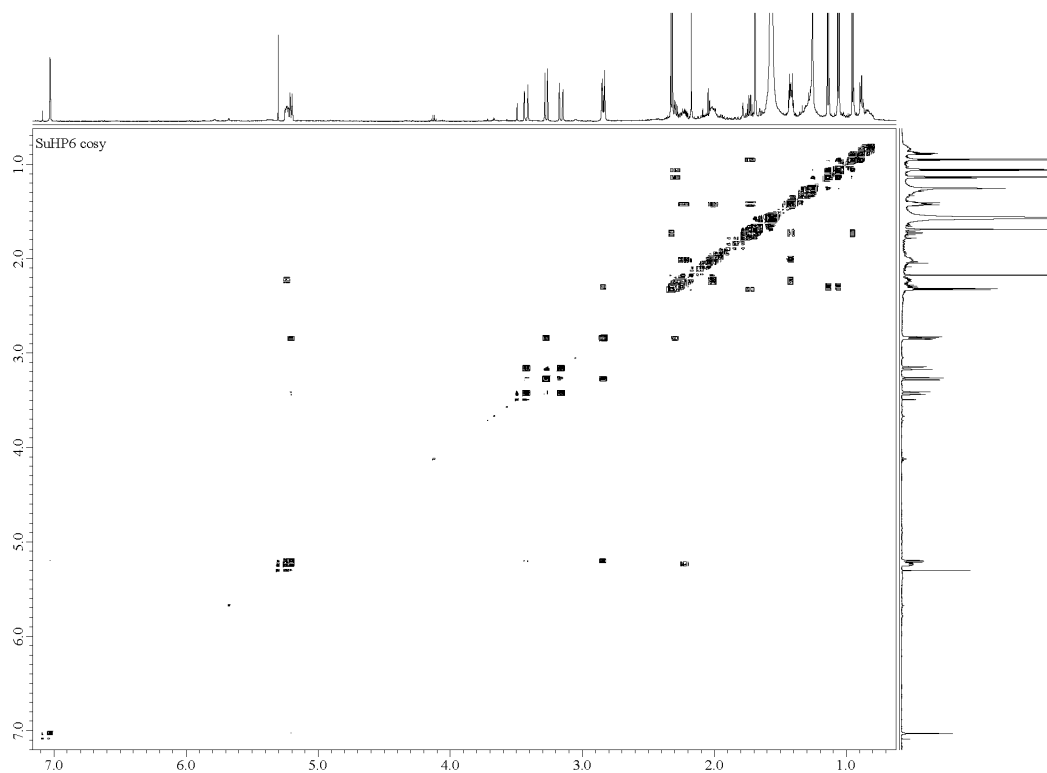

Figure S20. COSY spectrum of 7

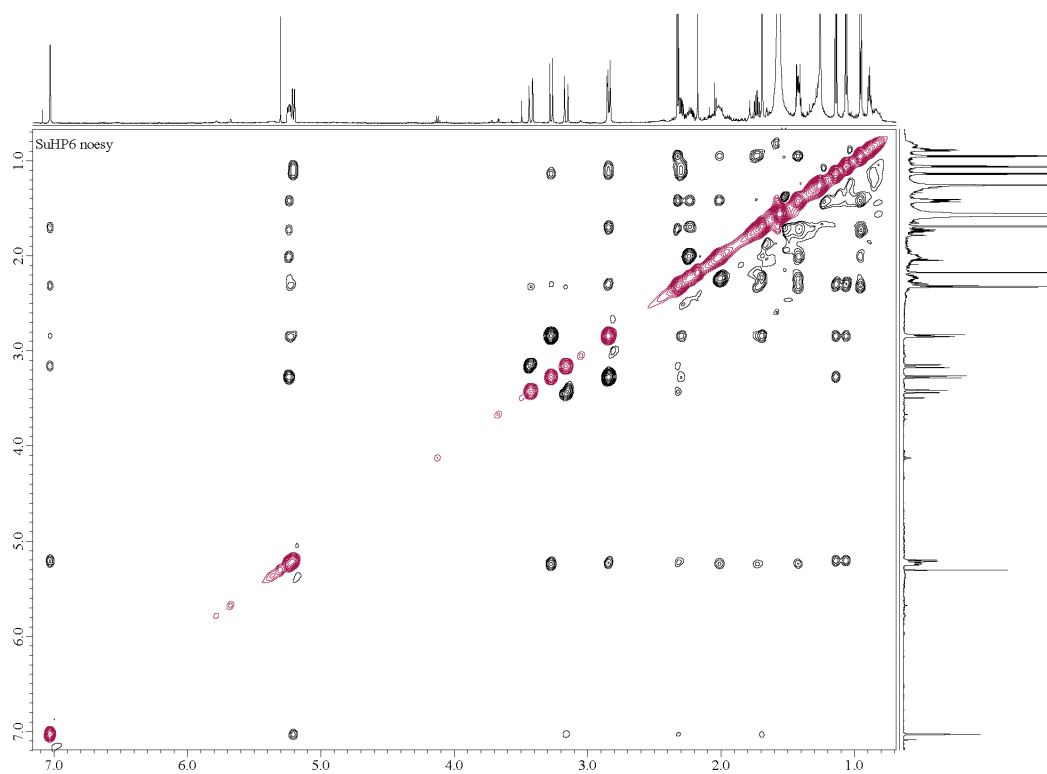

Figure S21. NOESY spectrum of 7

Table S1. Crystal data and structure refinement for **1** (ic22957).

|                                   |                                                |          |
|-----------------------------------|------------------------------------------------|----------|
| Identification code               | ic22957                                        |          |
| Empirical formula                 | C <sub>20</sub> H <sub>28</sub> O <sub>3</sub> |          |
| Formula weight                    | 316.42                                         |          |
| Temperature                       | 200(2) K                                       |          |
| Wavelength                        | 1.54178 Å                                      |          |
| Crystal system                    | Orthorhombic                                   |          |
| Space group                       | P2 <sub>1</sub> 2 <sub>1</sub> 2 <sub>1</sub>  |          |
| Unit cell dimensions              | a = 10.9787(4) Å                               | a = 90°. |
|                                   | b = 11.8275(4) Å                               | b = 90°. |
|                                   | c = 13.8005(5) Å                               | g = 90°. |
| Volume                            | 1792.00(11) Å <sup>3</sup>                     |          |
| Z                                 | 4                                              |          |
| Density (calculated)              | 1.173 Mg/m <sup>3</sup>                        |          |
| Absorption coefficient            | 0.609 mm <sup>-1</sup>                         |          |
| F(000)                            | 688                                            |          |
| Crystal size                      | 0.330 x 0.289 x 0.110 mm <sup>3</sup>          |          |
| Theta range for data collection   | 4.924 to 74.417°.                              |          |
| Index ranges                      | -13 ≤ h ≤ 13, -13 ≤ k ≤ 14, -17 ≤ l ≤ 16       |          |
| Reflections collected             | 18753                                          |          |
| Independent reflections           | 3646 [R(int) = 0.0333]                         |          |
| Completeness to theta = 67.679°   | 99.8 %                                         |          |
| Absorption correction             | Semi-empirical from equivalents                |          |
| Max. and min. transmission        | 0.9288 and 0.7389                              |          |
| Refinement method                 | Full-matrix least-squares on F <sup>2</sup>    |          |
| Data / restraints / parameters    | 3646 / 0 / 216                                 |          |
| Goodness-of-fit on F <sup>2</sup> | 1.046                                          |          |
| Final R indices [I > 2σ(I)]       | R1 = 0.0317, wR2 = 0.0859                      |          |
| R indices (all data)              | R1 = 0.0326, wR2 = 0.0866                      |          |
| Absolute structure parameter      | 0.16(5)                                        |          |
| Extinction coefficient            | n/a                                            |          |
| Largest diff. peak and hole       | 0.207 and -0.145 e.Å <sup>-3</sup>             |          |

Table S2. Atomic coordinates ( $\times 10^4$ ) and equivalent isotropic displacement parameters ( $\text{\AA}^2 \times 10^3$ ) for **1** (ic22957).  $U(\text{eq})$  is defined as one third of the trace of the orthogonalized  $U^{\text{ij}}$  tensor.

|       | x        | y       | z       | $U(\text{eq})$ |
|-------|----------|---------|---------|----------------|
| O(1)  | 8480(1)  | 4857(1) | 8120(1) | 34(1)          |
| O(2)  | 9905(1)  | 6768(1) | 6343(1) | 31(1)          |
| O(3)  | 9629(1)  | 8556(1) | 6021(1) | 38(1)          |
| C(1)  | 6094(2)  | 7272(2) | 7032(1) | 32(1)          |
| C(2)  | 6782(1)  | 6584(2) | 7570(1) | 31(1)          |
| C(3)  | 8050(1)  | 6834(1) | 7916(1) | 28(1)          |
| C(4)  | 8170(2)  | 7137(2) | 8984(1) | 34(1)          |
| C(5)  | 9255(2)  | 6835(2) | 9315(1) | 37(1)          |
| C(6)  | 10008(2) | 6270(2) | 8540(1) | 34(1)          |
| C(7)  | 9027(1)  | 5888(1) | 7806(1) | 28(1)          |
| C(8)  | 9520(2)  | 5674(1) | 6759(1) | 30(1)          |
| C(9)  | 8611(2)  | 4999(2) | 6126(1) | 36(1)          |
| C(10) | 8567(2)  | 5416(2) | 5075(1) | 41(1)          |
| C(11) | 7784(2)  | 6444(2) | 5053(1) | 37(1)          |
| C(12) | 8003(2)  | 7397(2) | 5539(1) | 31(1)          |
| C(13) | 7075(2)  | 8325(2) | 5623(1) | 37(1)          |
| C(14) | 6540(2)  | 8403(2) | 6661(1) | 35(1)          |
| C(15) | 4806(2)  | 6976(2) | 6715(2) | 44(1)          |
| C(16) | 4589(2)  | 5725(2) | 6533(2) | 66(1)          |
| C(17) | 3876(2)  | 7468(4) | 7408(3) | 91(1)          |
| C(18) | 7194(2)  | 7762(2) | 9512(2) | 47(1)          |
| C(19) | 10726(2) | 5039(2) | 6783(2) | 43(1)          |
| C(20) | 9202(2)  | 7605(1) | 5999(1) | 28(1)          |



Table S3. Bond lengths [Å] and angles [°] for **1** (ic22957).

---

|                  |            |
|------------------|------------|
| O(1)-C(7)        | 1.427(2)   |
| O(2)-C(20)       | 1.342(2)   |
| O(2)-C(8)        | 1.4785(19) |
| O(3)-C(20)       | 1.218(2)   |
| C(1)-C(2)        | 1.336(2)   |
| C(1)-C(14)       | 1.514(3)   |
| C(1)-C(15)       | 1.521(2)   |
| C(2)-C(3)        | 1.501(2)   |
| C(3)-C(4)        | 1.523(2)   |
| C(3)-C(7)        | 1.558(2)   |
| C(4)-C(5)        | 1.324(3)   |
| C(4)-C(18)       | 1.492(3)   |
| C(5)-C(6)        | 1.508(3)   |
| C(6)-C(7)        | 1.547(2)   |
| C(7)-C(8)        | 1.563(2)   |
| C(8)-C(19)       | 1.523(2)   |
| C(8)-C(9)        | 1.548(2)   |
| C(9)-C(10)       | 1.532(3)   |
| C(10)-C(11)      | 1.489(3)   |
| C(11)-C(12)      | 1.334(3)   |
| C(12)-C(20)      | 1.482(2)   |
| C(12)-C(13)      | 1.501(3)   |
| C(13)-C(14)      | 1.551(3)   |
| C(15)-C(17)      | 1.515(4)   |
| C(15)-C(16)      | 1.519(4)   |
|                  |            |
| C(20)-O(2)-C(8)  | 128.20(13) |
| C(2)-C(1)-C(14)  | 122.91(15) |
| C(2)-C(1)-C(15)  | 123.04(17) |
| C(14)-C(1)-C(15) | 114.02(15) |
| C(1)-C(2)-C(3)   | 125.50(16) |
| C(2)-C(3)-C(4)   | 115.75(14) |
| C(2)-C(3)-C(7)   | 117.74(14) |
| C(4)-C(3)-C(7)   | 101.76(13) |
| C(5)-C(4)-C(18)  | 127.67(18) |

|                   |            |
|-------------------|------------|
| C(5)-C(4)-C(3)    | 110.37(15) |
| C(18)-C(4)-C(3)   | 121.82(16) |
| C(4)-C(5)-C(6)    | 111.62(16) |
| C(5)-C(6)-C(7)    | 102.24(14) |
| O(1)-C(7)-C(6)    | 110.12(13) |
| O(1)-C(7)-C(3)    | 107.16(13) |
| C(6)-C(7)-C(3)    | 101.86(13) |
| O(1)-C(7)-C(8)    | 106.72(13) |
| C(6)-C(7)-C(8)    | 114.33(13) |
| C(3)-C(7)-C(8)    | 116.40(13) |
| O(2)-C(8)-C(19)   | 101.02(13) |
| O(2)-C(8)-C(9)    | 114.62(14) |
| C(19)-C(8)-C(9)   | 108.57(15) |
| O(2)-C(8)-C(7)    | 108.45(13) |
| C(19)-C(8)-C(7)   | 111.15(15) |
| C(9)-C(8)-C(7)    | 112.48(13) |
| C(10)-C(9)-C(8)   | 112.87(15) |
| C(11)-C(10)-C(9)  | 107.49(15) |
| C(12)-C(11)-C(10) | 125.13(17) |
| C(11)-C(12)-C(20) | 121.06(17) |
| C(11)-C(12)-C(13) | 122.30(16) |
| C(20)-C(12)-C(13) | 116.60(15) |
| C(12)-C(13)-C(14) | 111.81(14) |
| C(1)-C(14)-C(13)  | 112.47(15) |
| C(17)-C(15)-C(16) | 111.9(2)   |
| C(17)-C(15)-C(1)  | 110.9(2)   |
| C(16)-C(15)-C(1)  | 114.64(18) |
| O(3)-C(20)-O(2)   | 116.78(15) |
| O(3)-C(20)-C(12)  | 120.39(15) |
| O(2)-C(20)-C(12)  | 122.66(14) |

---

Table S4. Anisotropic displacement parameters ( $\text{\AA}^2 \times 10^3$ ) for **1** (ic22957). The anisotropic displacement factor exponent takes the form:  $-2p^2 [ h^2 a^*2U^{11} + \dots + 2 h k a^* b^* U^{12} ]$

|       | U <sup>11</sup> | U <sup>22</sup> | U <sup>33</sup> | U <sup>23</sup> | U <sup>13</sup> | U <sup>12</sup> |
|-------|-----------------|-----------------|-----------------|-----------------|-----------------|-----------------|
| O(1)  | 29(1)           | 33(1)           | 40(1)           | 11(1)           | -1(1)           | -2(1)           |
| O(2)  | 26(1)           | 31(1)           | 34(1)           | 3(1)            | 4(1)            | -5(1)           |
| O(3)  | 40(1)           | 31(1)           | 42(1)           | 0(1)            | -4(1)           | -10(1)          |
| C(1)  | 26(1)           | 41(1)           | 30(1)           | 2(1)            | -1(1)           | 1(1)            |
| C(2)  | 24(1)           | 36(1)           | 32(1)           | 5(1)            | 3(1)            | -1(1)           |
| C(3)  | 26(1)           | 32(1)           | 27(1)           | 3(1)            | 1(1)            | 2(1)            |
| C(4)  | 35(1)           | 36(1)           | 30(1)           | 1(1)            | 3(1)            | -3(1)           |
| C(5)  | 36(1)           | 47(1)           | 29(1)           | 0(1)            | -5(1)           | -4(1)           |
| C(6)  | 26(1)           | 38(1)           | 38(1)           | 4(1)            | -5(1)           | 0(1)            |
| C(7)  | 24(1)           | 29(1)           | 31(1)           | 4(1)            | 0(1)            | 0(1)            |
| C(8)  | 29(1)           | 26(1)           | 35(1)           | 2(1)            | 5(1)            | -1(1)           |
| C(9)  | 43(1)           | 29(1)           | 37(1)           | -3(1)           | 4(1)            | -7(1)           |
| C(10) | 52(1)           | 38(1)           | 32(1)           | -10(1)          | 4(1)            | -12(1)          |
| C(11) | 41(1)           | 44(1)           | 26(1)           | 0(1)            | -3(1)           | -13(1)          |
| C(12) | 32(1)           | 34(1)           | 25(1)           | 5(1)            | -2(1)           | -7(1)           |
| C(13) | 37(1)           | 40(1)           | 36(1)           | 10(1)           | -6(1)           | -2(1)           |
| C(14) | 33(1)           | 35(1)           | 38(1)           | 3(1)            | -7(1)           | 5(1)            |
| C(15) | 28(1)           | 56(1)           | 48(1)           | 10(1)           | -8(1)           | -1(1)           |
| C(16) | 46(1)           | 64(2)           | 88(2)           | 14(1)           | -23(1)          | -19(1)          |
| C(17) | 31(1)           | 135(3)          | 107(3)          | -27(2)          | 10(1)           | 6(2)            |
| C(18) | 48(1)           | 51(1)           | 42(1)           | -5(1)           | 10(1)           | 5(1)            |
| C(19) | 36(1)           | 41(1)           | 51(1)           | 3(1)            | 10(1)           | 10(1)           |
| C(20) | 30(1)           | 30(1)           | 24(1)           | -1(1)           | 3(1)            | -5(1)           |

Table S5. Hydrogen coordinates ( $\times 10^4$ ) and isotropic displacement parameters ( $\text{\AA}^2 \times 10^3$ ) for **1** (ic22957).

|        | x        | y        | z        | U(eq) |
|--------|----------|----------|----------|-------|
| H(1)   | 9050(20) | 4440(20) | 8350(20) | 50(7) |
| H(2)   | 6440     | 5876     | 7749     | 37    |
| H(3)   | 8347     | 7501     | 7537     | 34    |
| H(5)   | 9524     | 6958     | 9960     | 45    |
| H(6A)  | 10464    | 5616     | 8803     | 41    |
| H(6B)  | 10589    | 6808     | 8242     | 41    |
| H(9A)  | 8846     | 4191     | 6131     | 44    |
| H(9B)  | 7787     | 5060     | 6412     | 44    |
| H(10A) | 9398     | 5600     | 4845     | 49    |
| H(10B) | 8223     | 4823     | 4649     | 49    |
| H(11)  | 7073     | 6419     | 4661     | 44    |
| H(13A) | 6407     | 8184     | 5157     | 45    |
| H(13B) | 7460     | 9055     | 5452     | 45    |
| H(14A) | 7174     | 8696     | 7105     | 42    |
| H(14B) | 5855     | 8946     | 6661     | 42    |
| H(15)  | 4675     | 7364     | 6080     | 53    |
| H(16A) | 3773     | 5617     | 6261     | 99    |
| H(16B) | 4656     | 5310     | 7145     | 99    |
| H(16C) | 5200     | 5441     | 6075     | 99    |
| H(17A) | 3059     | 7388     | 7131     | 136   |
| H(17B) | 4053     | 8271     | 7514     | 136   |
| H(17C) | 3916     | 7064     | 8027     | 136   |
| H(18A) | 7447     | 7888     | 10184    | 70    |
| H(18B) | 6441     | 7316     | 9503     | 70    |
| H(18C) | 7051     | 8492     | 9196     | 70    |
| H(19A) | 10626    | 4333     | 7147     | 64    |
| H(19B) | 11345    | 5509     | 7098     | 64    |
| H(19C) | 10983    | 4866     | 6119     | 64    |

Table S6. Crystal data and structure refinement for **2** (ic22934).

|                                   |                                                |          |
|-----------------------------------|------------------------------------------------|----------|
| Identification code               | ic22934                                        |          |
| Empirical formula                 | C <sub>20</sub> H <sub>28</sub> O <sub>3</sub> |          |
| Formula weight                    | 316.42                                         |          |
| Temperature                       | 200(2) K                                       |          |
| Wavelength                        | 1.54178 Å                                      |          |
| Crystal system                    | Orthorhombic                                   |          |
| Space group                       | P2 <sub>1</sub> 2 <sub>1</sub> 2 <sub>1</sub>  |          |
| Unit cell dimensions              | a = 10.9227(3) Å                               | a = 90°. |
|                                   | b = 11.4366(3) Å                               | b = 90°. |
|                                   | c = 14.0387(4) Å                               | g = 90°. |
| Volume                            | 1753.69(8) Å <sup>3</sup>                      |          |
| Z                                 | 4                                              |          |
| Density (calculated)              | 1.198 Mg/m <sup>3</sup>                        |          |
| Absorption coefficient            | 0.622 mm <sup>-1</sup>                         |          |
| F(000)                            | 688                                            |          |
| Crystal size                      | 0.171 x 0.142 x 0.109 mm <sup>3</sup>          |          |
| Theta range for data collection   | 4.988 to 74.394°.                              |          |
| Index ranges                      | -12 ≤ h ≤ 13, -13 ≤ k ≤ 11, -17 ≤ l ≤ 17       |          |
| Reflections collected             | 15840                                          |          |
| Independent reflections           | 3550 [R(int) = 0.0292]                         |          |
| Completeness to theta = 67.679°   | 100.0 %                                        |          |
| Absorption correction             | Semi-empirical from equivalents                |          |
| Max. and min. transmission        | 0.9154 and 0.7309                              |          |
| Refinement method                 | Full-matrix least-squares on F <sup>2</sup>    |          |
| Data / restraints / parameters    | 3550 / 6 / 212                                 |          |
| Goodness-of-fit on F <sup>2</sup> | 1.031                                          |          |
| Final R indices [I > 2σ(I)]       | R1 = 0.0296, wR2 = 0.0799                      |          |
| R indices (all data)              | R1 = 0.0302, wR2 = 0.0804                      |          |
| Absolute structure parameter      | 0.08(6)                                        |          |
| Extinction coefficient            | n/a                                            |          |
| Largest diff. peak and hole       | 0.167 and -0.165 e.Å <sup>-3</sup>             |          |

Table S7. Atomic coordinates ( $\times 10^4$ ) and equivalent isotropic displacement parameters ( $\text{\AA}^2 \times 10^3$ ) for **2** (ic22934). U(eq) is defined as one third of the trace of the orthogonalized  $U_{ij}$  tensor.

|       | x       | y       | z       | U(eq) |
|-------|---------|---------|---------|-------|
| O(1)  | 1532(1) | 5040(1) | 1774(1) | 30(1) |
| O(2)  | 180(1)  | 6911(1) | 3643(1) | 26(1) |
| O(3)  | 457(1)  | 8738(1) | 4026(1) | 31(1) |
| C(1)  | 3969(2) | 7468(2) | 2982(1) | 28(1) |
| C(2)  | 3286(1) | 6783(2) | 2425(1) | 28(1) |
| C(3)  | 2018(1) | 7048(1) | 2078(1) | 24(1) |
| C(4)  | 1957(2) | 7387(2) | 1028(1) | 30(1) |
| C(5)  | 723(2)  | 7036(2) | 642(1)  | 36(1) |
| C(6)  | 18(2)   | 6565(2) | 1499(1) | 30(1) |
| C(7)  | 1022(1) | 6083(1) | 2162(1) | 24(1) |
| C(8)  | 562(1)  | 5800(1) | 3186(1) | 25(1) |
| C(9)  | 1489(2) | 5073(2) | 3766(1) | 30(1) |
| C(10) | 1528(2) | 5421(2) | 4824(1) | 34(1) |
| C(11) | 2304(2) | 6489(2) | 4901(1) | 31(1) |
| C(12) | 2084(1) | 7502(1) | 4468(1) | 26(1) |
| C(13) | 3014(2) | 8472(2) | 4420(1) | 31(1) |
| C(14) | 3520(2) | 8612(2) | 3396(1) | 31(1) |
| C(15) | 5268(2) | 7143(2) | 3281(2) | 41(1) |
| C(16) | 5466(2) | 5846(2) | 3465(2) | 52(1) |
| C(17) | 6195(2) | 7619(4) | 2581(3) | 91(1) |
| C(18) | 2844(2) | 7922(2) | 553(1)  | 43(1) |
| C(19) | -654(2) | 5144(2) | 3164(1) | 36(1) |
| C(20) | 884(1)  | 7755(1) | 4018(1) | 23(1) |

Table S8. Bond lengths [ $\text{\AA}$ ] and angles [ $^\circ$ ] for **2** (ic22934).

---

|                  |            |
|------------------|------------|
| O(1)-C(7)        | 1.4254(19) |
| O(2)-C(20)       | 1.3419(19) |
| O(2)-C(8)        | 1.4828(19) |
| O(3)-C(20)       | 1.2165(19) |
| C(1)-C(2)        | 1.334(2)   |
| C(1)-C(14)       | 1.514(2)   |
| C(1)-C(15)       | 1.526(2)   |
| C(2)-C(3)        | 1.500(2)   |
| C(3)-C(4)        | 1.525(2)   |
| C(3)-C(7)        | 1.554(2)   |
| C(4)-C(18)       | 1.326(3)   |
| C(4)-C(5)        | 1.508(2)   |
| C(5)-C(6)        | 1.526(3)   |
| C(6)-C(7)        | 1.540(2)   |
| C(7)-C(8)        | 1.557(2)   |
| C(8)-C(19)       | 1.526(2)   |
| C(8)-C(9)        | 1.542(2)   |
| C(9)-C(10)       | 1.537(2)   |
| C(10)-C(11)      | 1.491(3)   |
| C(11)-C(12)      | 1.330(2)   |
| C(12)-C(20)      | 1.484(2)   |
| C(12)-C(13)      | 1.506(2)   |
| C(13)-C(14)      | 1.548(2)   |
| C(15)-C(17)      | 1.512(4)   |
| C(15)-C(16)      | 1.521(3)   |
| <br>             |            |
| C(20)-O(2)-C(8)  | 128.69(12) |
| C(2)-C(1)-C(14)  | 123.46(15) |
| C(2)-C(1)-C(15)  | 122.53(17) |
| C(14)-C(1)-C(15) | 113.99(15) |
| C(1)-C(2)-C(3)   | 126.02(16) |
| C(2)-C(3)-C(4)   | 113.92(13) |
| C(2)-C(3)-C(7)   | 118.60(14) |
| C(4)-C(3)-C(7)   | 102.94(13) |
| C(18)-C(4)-C(5)  | 126.48(17) |

|                   |            |
|-------------------|------------|
| C(18)-C(4)-C(3)   | 124.91(17) |
| C(5)-C(4)-C(3)    | 108.60(14) |
| C(4)-C(5)-C(6)    | 105.12(14) |
| C(5)-C(6)-C(7)    | 104.13(14) |
| O(1)-C(7)-C(6)    | 110.32(13) |
| O(1)-C(7)-C(3)    | 106.97(12) |
| C(6)-C(7)-C(3)    | 101.42(13) |
| O(1)-C(7)-C(8)    | 107.74(13) |
| C(6)-C(7)-C(8)    | 113.78(13) |
| C(3)-C(7)-C(8)    | 116.33(12) |
| O(2)-C(8)-C(19)   | 100.67(12) |
| O(2)-C(8)-C(9)    | 114.74(13) |
| C(19)-C(8)-C(9)   | 108.48(14) |
| O(2)-C(8)-C(7)    | 108.17(12) |
| C(19)-C(8)-C(7)   | 111.35(13) |
| C(9)-C(8)-C(7)    | 112.82(13) |
| C(10)-C(9)-C(8)   | 112.87(14) |
| C(11)-C(10)-C(9)  | 107.36(14) |
| C(12)-C(11)-C(10) | 125.28(15) |
| C(11)-C(12)-C(20) | 121.62(15) |
| C(11)-C(12)-C(13) | 122.72(15) |
| C(20)-C(12)-C(13) | 115.64(14) |
| C(12)-C(13)-C(14) | 111.04(13) |
| C(1)-C(14)-C(13)  | 112.50(14) |
| C(17)-C(15)-C(16) | 111.5(2)   |
| C(17)-C(15)-C(1)  | 110.85(19) |
| C(16)-C(15)-C(1)  | 114.64(17) |
| O(3)-C(20)-O(2)   | 116.65(14) |
| O(3)-C(20)-C(12)  | 121.00(14) |
| O(2)-C(20)-C(12)  | 122.20(13) |

---



Table S9. Anisotropic displacement parameters ( $\text{\AA}^2 \times 10^3$ ) for **2** (ic22934). The anisotropic displacement factor exponent takes the form:  $-2p^2[ h^2 a^*2U^{11} + \dots + 2 h k a^* b^* U^{12} ]$

|       | U <sup>11</sup> | U <sup>22</sup> | U <sup>33</sup> | U <sup>23</sup> | U <sup>13</sup> | U <sup>12</sup> |
|-------|-----------------|-----------------|-----------------|-----------------|-----------------|-----------------|
| O(1)  | 26(1)           | 28(1)           | 36(1)           | -11(1)          | -1(1)           | 1(1)            |
| O(2)  | 21(1)           | 26(1)           | 30(1)           | -4(1)           | 3(1)            | 3(1)            |
| O(3)  | 35(1)           | 25(1)           | 34(1)           | -1(1)           | -4(1)           | 7(1)            |
| C(1)  | 22(1)           | 35(1)           | 28(1)           | 0(1)            | -1(1)           | -3(1)           |
| C(2)  | 21(1)           | 32(1)           | 29(1)           | -4(1)           | 3(1)            | 0(1)            |
| C(3)  | 22(1)           | 27(1)           | 24(1)           | -4(1)           | 2(1)            | -2(1)           |
| C(4)  | 31(1)           | 31(1)           | 26(1)           | -3(1)           | 2(1)            | 3(1)            |
| C(5)  | 35(1)           | 45(1)           | 29(1)           | 0(1)            | -5(1)           | 1(1)            |
| C(6)  | 24(1)           | 33(1)           | 34(1)           | -3(1)           | -5(1)           | 0(1)            |
| C(7)  | 21(1)           | 24(1)           | 28(1)           | -5(1)           | 0(1)            | 1(1)            |
| C(8)  | 24(1)           | 21(1)           | 31(1)           | -3(1)           | 3(1)            | 1(1)            |
| C(9)  | 33(1)           | 22(1)           | 36(1)           | 2(1)            | 2(1)            | 4(1)            |
| C(10) | 41(1)           | 29(1)           | 31(1)           | 8(1)            | 3(1)            | 7(1)            |
| C(11) | 32(1)           | 36(1)           | 23(1)           | 1(1)            | -2(1)           | 9(1)            |
| C(12) | 26(1)           | 29(1)           | 22(1)           | -3(1)           | -1(1)           | 3(1)            |
| C(13) | 30(1)           | 34(1)           | 30(1)           | -6(1)           | -5(1)           | -1(1)           |
| C(14) | 29(1)           | 30(1)           | 32(1)           | -1(1)           | -5(1)           | -6(1)           |
| C(15) | 25(1)           | 48(1)           | 50(1)           | -9(1)           | -8(1)           | 0(1)            |
| C(16) | 38(1)           | 58(1)           | 59(1)           | -10(1)          | -12(1)          | 15(1)           |
| C(17) | 25(1)           | 118(3)          | 128(3)          | 45(2)           | 12(1)           | -2(1)           |
| C(18) | 41(1)           | 54(1)           | 35(1)           | 6(1)            | 9(1)            | -1(1)           |
| C(19) | 30(1)           | 34(1)           | 45(1)           | -4(1)           | 7(1)            | -9(1)           |
| C(20) | 25(1)           | 25(1)           | 20(1)           | 1(1)            | 3(1)            | 3(1)            |

Table S10. Hydrogen coordinates ( $\times 10^4$ ) and isotropic displacement parameters ( $\text{\AA}^2 \times 10^{-3}$ ) for **2** (ic22934).

|        | x     | y    | z    | U(eq) |
|--------|-------|------|------|-------|
| H(1)   | 968   | 4616 | 1559 | 45    |
| H(2)   | 3636  | 6061 | 2231 | 33    |
| H(3)   | 1719  | 7736 | 2450 | 29    |
| H(5A)  | 811   | 6425 | 147  | 44    |
| H(5B)  | 296   | 7718 | 361  | 44    |
| H(6A)  | -555  | 5939 | 1305 | 36    |
| H(6B)  | -450  | 7196 | 1815 | 36    |
| H(9A)  | 1270  | 4236 | 3716 | 36    |
| H(9B)  | 2314  | 5175 | 3487 | 36    |
| H(10A) | 691   | 5584 | 5059 | 40    |
| H(10B) | 1882  | 4779 | 5208 | 40    |
| H(11)  | 3012  | 6443 | 5292 | 37    |
| H(13A) | 3698  | 8298 | 4861 | 38    |
| H(13B) | 2630  | 9214 | 4625 | 38    |
| H(14A) | 2867  | 8932 | 2981 | 37    |
| H(14B) | 4203  | 9181 | 3403 | 37    |
| H(15)  | 5423  | 7550 | 3900 | 49    |
| H(16A) | 6291  | 5723 | 3720 | 78    |
| H(16B) | 5376  | 5413 | 2867 | 78    |
| H(16C) | 4859  | 5567 | 3926 | 78    |
| H(17A) | 7023  | 7493 | 2830 | 136   |
| H(17B) | 6056  | 8458 | 2490 | 136   |
| H(17C) | 6107  | 7213 | 1970 | 136   |
| H(18A) | 2731  | 8121 | -99  | 52    |
| H(18B) | 3592  | 8107 | 863  | 52    |
| H(19A) | -577  | 4454 | 2756 | 55    |
| H(19B) | -1294 | 5659 | 2911 | 55    |
| H(19C) | -873  | 4900 | 3811 | 55    |

Table S11. Crystal data and structure refinement for **6** (ic22883).

|                                   |                                               |          |
|-----------------------------------|-----------------------------------------------|----------|
| Identification code               | ic22883                                       |          |
| Empirical formula                 | C20 H30 O3                                    |          |
| Formula weight                    | 318.44                                        |          |
| Temperature                       | 200(2) K                                      |          |
| Wavelength                        | 1.54178 Å                                     |          |
| Crystal system                    | Orthorhombic                                  |          |
| Space group                       | P2 <sub>1</sub> 2 <sub>1</sub> 2 <sub>1</sub> |          |
| Unit cell dimensions              | a = 7.6524(2) Å                               | a = 90°. |
|                                   | b = 13.8446(3) Å                              | b = 90°. |
|                                   | c = 17.0676(4) Å                              | g = 90°. |
| Volume                            | 1808.22(7) Å <sup>3</sup>                     |          |
| Z                                 | 4                                             |          |
| Density (calculated)              | 1.170 Mg/m <sup>3</sup>                       |          |
| Absorption coefficient            | 0.604 mm <sup>-1</sup>                        |          |
| F(000)                            | 696                                           |          |
| Crystal size                      | 0.332 x 0.118 x 0.100 mm <sup>3</sup>         |          |
| Theta range for data collection   | 4.111 to 74.422°.                             |          |
| Index ranges                      | -8 ≤ h ≤ 9, -15 ≤ k ≤ 17, -19 ≤ l ≤ 21        |          |
| Reflections collected             | 14037                                         |          |
| Independent reflections           | 3676 [R(int) = 0.0327]                        |          |
| Completeness to theta = 67.679°   | 99.9 %                                        |          |
| Absorption correction             | Semi-empirical from equivalents               |          |
| Max. and min. transmission        | 0.9819 and 0.8779                             |          |
| Refinement method                 | Full-matrix least-squares on F <sup>2</sup>   |          |
| Data / restraints / parameters    | 3676 / 0 / 213                                |          |
| Goodness-of-fit on F <sup>2</sup> | 1.035                                         |          |
| Final R indices [I > 2σ(I)]       | R1 = 0.0296, wR2 = 0.0777                     |          |
| R indices (all data)              | R1 = 0.0315, wR2 = 0.0790                     |          |
| Absolute structure parameter      | -0.07(7)                                      |          |
| Extinction coefficient            | n/a                                           |          |
| Largest diff. peak and hole       | 0.149 and -0.141 e.Å <sup>-3</sup>            |          |

Table S12. Atomic coordinates ( $\times 10^4$ ) and equivalent isotropic displacement parameters ( $\text{\AA}^2 \times 10^3$ ) for **6** (ic22883).  $U(\text{eq})$  is defined as one third of the trace of the orthogonalized  $U_{ij}$  tensor.

|       | x       | y       | z       | $U(\text{eq})$ |
|-------|---------|---------|---------|----------------|
| O(1)  | 1215(1) | 3162(1) | 8786(1) | 40(1)          |
| O(2)  | 5959(1) | 3189(1) | 8510(1) | 41(1)          |
| O(3)  | 8294(2) | 3176(1) | 7794(1) | 54(1)          |
| C(1)  | 5444(2) | 3963(1) | 5606(1) | 30(1)          |
| C(2)  | 3965(2) | 4351(1) | 5889(1) | 32(1)          |
| C(3)  | 3550(2) | 4507(1) | 6711(1) | 31(1)          |
| C(4)  | 2130(2) | 4953(1) | 6999(1) | 33(1)          |
| C(5)  | 1777(2) | 5060(1) | 7866(1) | 37(1)          |
| C(6)  | 3011(2) | 4545(1) | 8427(1) | 37(1)          |
| C(7)  | 2782(2) | 3450(1) | 8398(1) | 30(1)          |
| C(8)  | 4240(2) | 2868(1) | 8806(1) | 36(1)          |
| C(9)  | 4040(2) | 1786(1) | 8693(1) | 42(1)          |
| C(10) | 3514(2) | 1464(1) | 7878(1) | 40(1)          |
| C(11) | 4593(2) | 1812(1) | 7208(1) | 34(1)          |
| C(12) | 5927(2) | 2433(1) | 7178(1) | 30(1)          |
| C(13) | 6893(2) | 2597(1) | 6412(1) | 36(1)          |
| C(14) | 6958(2) | 3652(1) | 6116(1) | 31(1)          |
| C(15) | 5694(2) | 3890(1) | 4721(1) | 36(1)          |
| C(16) | 6929(3) | 4681(2) | 4431(1) | 50(1)          |
| C(17) | 6323(2) | 2896(1) | 4452(1) | 41(1)          |
| C(18) | 750(2)  | 5408(2) | 6490(1) | 48(1)          |
| C(19) | 4364(3) | 3119(2) | 9672(1) | 54(1)          |
| C(20) | 6769(2) | 2935(1) | 7853(1) | 35(1)          |

Table S13. Bond lengths [ $\text{\AA}$ ] and angles [ $^\circ$ ] for **6** (ic22883).

---

|                  |            |
|------------------|------------|
| O(1)-C(7)        | 1.4269(17) |
| O(2)-C(20)       | 1.329(2)   |
| O(2)-C(8)        | 1.4775(18) |
| O(3)-C(20)       | 1.218(2)   |
| C(1)-C(2)        | 1.343(2)   |
| C(1)-C(14)       | 1.511(2)   |
| C(1)-C(15)       | 1.526(2)   |
| C(2)-C(3)        | 1.454(2)   |
| C(3)-C(4)        | 1.343(2)   |
| C(4)-C(18)       | 1.506(2)   |
| C(4)-C(5)        | 1.512(2)   |
| C(5)-C(6)        | 1.523(2)   |
| C(6)-C(7)        | 1.527(2)   |
| C(7)-C(8)        | 1.543(2)   |
| C(8)-C(9)        | 1.518(3)   |
| C(8)-C(19)       | 1.521(2)   |
| C(9)-C(10)       | 1.515(3)   |
| C(10)-C(11)      | 1.489(2)   |
| C(11)-C(12)      | 1.336(2)   |
| C(12)-C(20)      | 1.491(2)   |
| C(12)-C(13)      | 1.518(2)   |
| C(13)-C(14)      | 1.547(2)   |
| C(15)-C(16)      | 1.529(3)   |
| C(15)-C(17)      | 1.529(2)   |
| <br>             |            |
| C(20)-O(2)-C(8)  | 128.56(13) |
| C(2)-C(1)-C(14)  | 123.54(14) |
| C(2)-C(1)-C(15)  | 119.23(14) |
| C(14)-C(1)-C(15) | 117.08(13) |
| C(1)-C(2)-C(3)   | 126.21(15) |
| C(4)-C(3)-C(2)   | 126.72(15) |
| C(3)-C(4)-C(18)  | 123.27(16) |
| C(3)-C(4)-C(5)   | 123.24(15) |
| C(18)-C(4)-C(5)  | 113.48(14) |
| C(4)-C(5)-C(6)   | 117.32(13) |

|                   |            |
|-------------------|------------|
| C(5)-C(6)-C(7)    | 111.89(13) |
| O(1)-C(7)-C(6)    | 111.04(13) |
| O(1)-C(7)-C(8)    | 104.56(12) |
| C(6)-C(7)-C(8)    | 114.87(13) |
| O(2)-C(8)-C(9)    | 110.09(14) |
| O(2)-C(8)-C(19)   | 101.95(13) |
| C(9)-C(8)-C(19)   | 110.77(16) |
| O(2)-C(8)-C(7)    | 109.45(13) |
| C(9)-C(8)-C(7)    | 112.69(13) |
| C(19)-C(8)-C(7)   | 111.36(15) |
| C(10)-C(9)-C(8)   | 115.62(14) |
| C(11)-C(10)-C(9)  | 117.55(14) |
| C(12)-C(11)-C(10) | 131.41(16) |
| C(11)-C(12)-C(20) | 126.84(14) |
| C(11)-C(12)-C(13) | 120.14(15) |
| C(20)-C(12)-C(13) | 112.63(13) |
| C(12)-C(13)-C(14) | 116.00(13) |
| C(1)-C(14)-C(13)  | 115.61(13) |
| C(1)-C(15)-C(16)  | 110.54(15) |
| C(1)-C(15)-C(17)  | 113.30(14) |
| C(16)-C(15)-C(17) | 110.71(14) |
| O(3)-C(20)-O(2)   | 116.29(16) |
| O(3)-C(20)-C(12)  | 118.57(15) |
| O(2)-C(20)-C(12)  | 125.05(13) |

---

Table S14. Anisotropic displacement parameters ( $\text{\AA}^2 \times 10^3$ ) for **6** (ic22883). The anisotropic displacement factor exponent takes the form:  $-2p^2[ h^2 a^*2U^{11} + \dots + 2 h k a^* b^* U^{12} ]$

|       | U <sup>11</sup> | U <sup>22</sup> | U <sup>33</sup> | U <sup>23</sup> | U <sup>13</sup> | U <sup>12</sup> |
|-------|-----------------|-----------------|-----------------|-----------------|-----------------|-----------------|
| O(1)  | 25(1)           | 59(1)           | 36(1)           | 14(1)           | 1(1)            | -4(1)           |
| O(2)  | 25(1)           | 63(1)           | 34(1)           | -3(1)           | -2(1)           | -8(1)           |
| O(3)  | 24(1)           | 97(1)           | 42(1)           | 8(1)            | -4(1)           | -14(1)          |
| C(1)  | 30(1)           | 30(1)           | 30(1)           | 2(1)            | 2(1)            | 0(1)            |
| C(2)  | 31(1)           | 32(1)           | 33(1)           | 3(1)            | 3(1)            | 3(1)            |
| C(3)  | 31(1)           | 28(1)           | 33(1)           | 2(1)            | 5(1)            | 2(1)            |
| C(4)  | 31(1)           | 27(1)           | 41(1)           | 1(1)            | 8(1)            | -1(1)           |
| C(5)  | 38(1)           | 31(1)           | 42(1)           | -3(1)           | 13(1)           | 2(1)            |
| C(6)  | 39(1)           | 41(1)           | 32(1)           | -9(1)           | 6(1)            | -5(1)           |
| C(7)  | 26(1)           | 40(1)           | 25(1)           | 1(1)            | 0(1)            | -4(1)           |
| C(8)  | 24(1)           | 58(1)           | 27(1)           | 6(1)            | 0(1)            | -3(1)           |
| C(9)  | 34(1)           | 50(1)           | 43(1)           | 19(1)           | 4(1)            | 5(1)            |
| C(10) | 32(1)           | 32(1)           | 56(1)           | 7(1)            | 3(1)            | -2(1)           |
| C(11) | 31(1)           | 31(1)           | 39(1)           | 1(1)            | -2(1)           | 4(1)            |
| C(12) | 27(1)           | 33(1)           | 31(1)           | 5(1)            | 0(1)            | 5(1)            |
| C(13) | 36(1)           | 36(1)           | 34(1)           | 3(1)            | 6(1)            | 8(1)            |
| C(14) | 28(1)           | 33(1)           | 31(1)           | 1(1)            | 5(1)            | 0(1)            |
| C(15) | 31(1)           | 48(1)           | 29(1)           | 1(1)            | 1(1)            | 6(1)            |
| C(16) | 61(1)           | 50(1)           | 38(1)           | 9(1)            | 12(1)           | 2(1)            |
| C(17) | 36(1)           | 51(1)           | 35(1)           | -10(1)          | 4(1)            | 1(1)            |
| C(18) | 38(1)           | 54(1)           | 53(1)           | 6(1)            | 7(1)            | 15(1)           |
| C(19) | 39(1)           | 95(2)           | 28(1)           | 2(1)            | -4(1)           | 2(1)            |
| C(20) | 23(1)           | 49(1)           | 32(1)           | 7(1)            | -3(1)           | -2(1)           |

Table S15. Hydrogen coordinates ( $\times 10^4$ ) and isotropic displacement parameters ( $\text{\AA}^2 \times 10^3$ ) for **6** (ic22883).

|        | x    | y    | z    | U(eq) |
|--------|------|------|------|-------|
| H(1A)  | 362  | 3232 | 8482 | 48    |
| H(2)   | 3108 | 4541 | 5517 | 38    |
| H(3)   | 4368 | 4269 | 7083 | 37    |
| H(5A)  | 577  | 4825 | 7969 | 45    |
| H(5B)  | 1797 | 5758 | 7994 | 45    |
| H(6A)  | 2789 | 4774 | 8968 | 45    |
| H(6B)  | 4232 | 4710 | 8291 | 45    |
| H(7)   | 2713 | 3244 | 7837 | 36    |
| H(9A)  | 5164 | 1473 | 8828 | 51    |
| H(9B)  | 3154 | 1548 | 9069 | 51    |
| H(10A) | 3519 | 750  | 7868 | 48    |
| H(10B) | 2294 | 1675 | 7787 | 48    |
| H(11)  | 4276 | 1544 | 6716 | 41    |
| H(13A) | 6335 | 2195 | 6003 | 43    |
| H(13B) | 8108 | 2364 | 6476 | 43    |
| H(14A) | 7010 | 4086 | 6576 | 37    |
| H(14B) | 8053 | 3742 | 5816 | 37    |
| H(15)  | 4530 | 4007 | 4472 | 44    |
| H(16A) | 7013 | 4652 | 3859 | 75    |
| H(16B) | 8090 | 4585 | 4660 | 75    |
| H(16C) | 6476 | 5314 | 4588 | 75    |
| H(17A) | 6340 | 2873 | 3878 | 61    |
| H(17B) | 5528 | 2398 | 4652 | 61    |
| H(17C) | 7503 | 2778 | 4654 | 61    |
| H(18A) | 774  | 6111 | 6558 | 72    |
| H(18B) | -402 | 5160 | 6640 | 72    |
| H(18C) | 980  | 5250 | 5940 | 72    |
| H(19A) | 3218 | 3034 | 9918 | 81    |
| H(19B) | 4740 | 3792 | 9729 | 81    |
| H(19C) | 5215 | 2693 | 9925 | 81    |
